# Supplementary material for: The decay of the refocused Hahn echo in double electron–electron resonance (DEER) experiments
Source: Copernicus journal article supplement (doi:10.5194/mr-2-161-2021), 2021-04-16
Supplement: Supplementary file [file mr-2-161-2021-supplement.pdf]

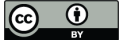

*Supplement of*

## **The decay of the refocused Hahn echo in double electron–electron resonance (DEER) experiments**

**Thorsten Bahrenberg et al.**

*Correspondence to:* Stefan Stoll ([stst@uw.edu](mailto:stst@uw.edu)) and Daniella Goldfarb ([daniella.goldfarb@weizmann.ac.il](mailto:daniella.goldfarb@weizmann.ac.il))

The copyright of individual parts of the supplement might differ from the article licence.

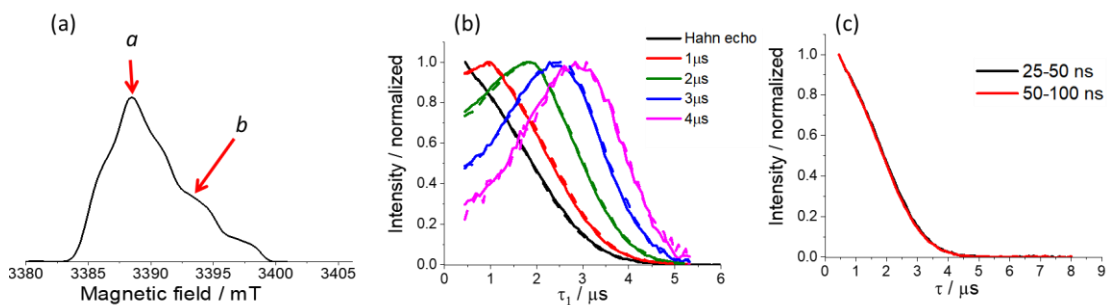

**Figure S1.** (a) W-band echo-detected EPR spectrum of 100  $\mu\text{M}$  3-maleimido-proxyl in  $\text{H}_2\text{O}/\text{glycerol}$  (80:20 v/v) measured at 25 K (different batch than that shown in Fig. 3). (b) Normalized echo intensity as a function  $\tau_1$  of for several  $\tau_2$  values (indicated on the Figure) measured at the two different field positions, *a* (solid lines) and *b* (dashed lines) as indicated in (a), together with a Hahn echo decay. The  $\pi/2$  and  $\pi$  pulse durations were 25 and 50 ns. (c) Comparison of the Hahn echo decay recorded at position *a* with different  $\pi/2$  and  $\pi$  pulses as noted on the figure.

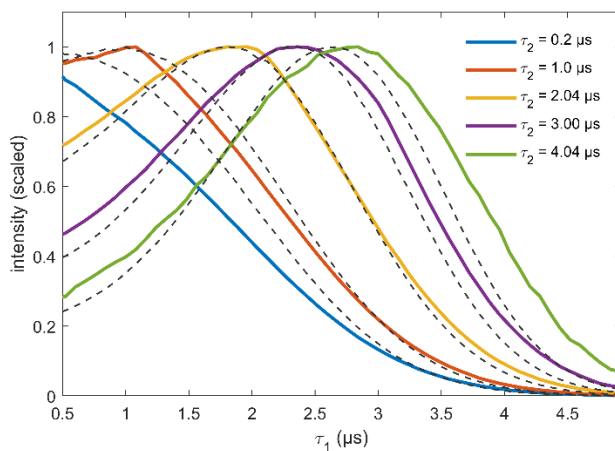

**Figure S2.** Comparison of the experimental refocused Hahn echo decays for 3-maleimido-proxyl (solid coloured lines; as in Figure 3c) with the CCE simulations (dashed black lines; as in Fig. 9b). The simulations reproduce the experimental trends well. The largest deviations are seen at short and large  $\tau_2$  values.

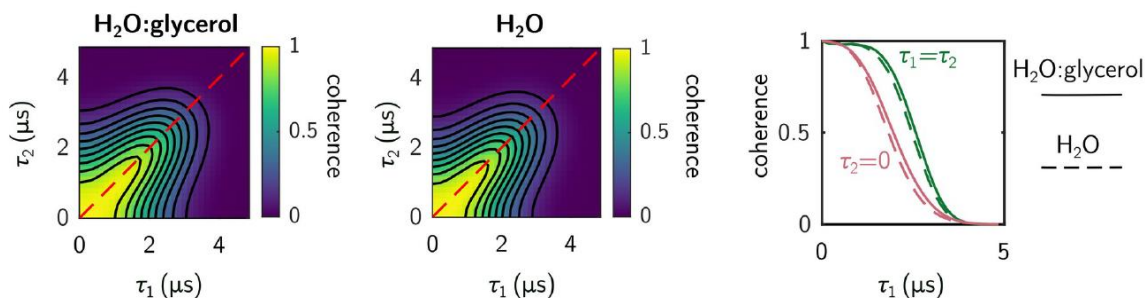

**Figure S3.** CCE simulations of the refocused echo decay for different solvents: H<sub>2</sub>O:glycerol (left) and H<sub>2</sub>O (centre), and a comparison of the  $\tau_2 = 0$  and  $\tau_1 = \tau_2$  traces (right). The H<sub>2</sub>O:glycerol simulation is the same 3-CCE simulation as in Figure 10. The H<sub>2</sub>O simulation has an identical input, save for the solvent environment, a pure water solvent instead of a mixture of water and glycerol. Consequently, the water-only system has 494 one-clusters, 4,124 two-clusters, and 49,178 three-clusters. Both solvents give very similar decays.

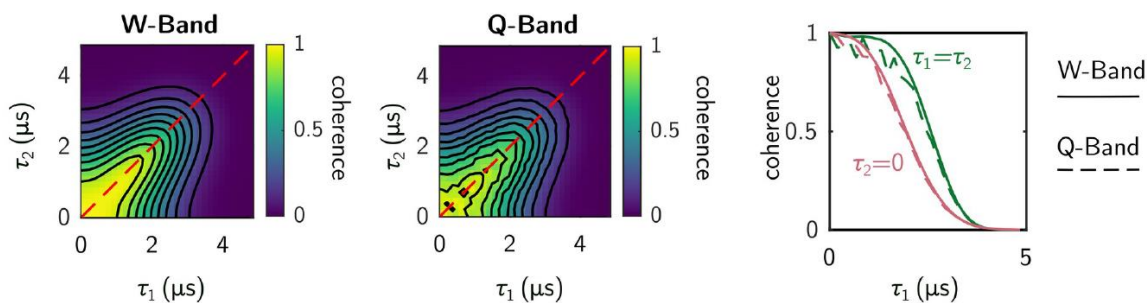

**Figure S4.** CCE simulations of the refocused Hahn echo for W-band (left) and Q-band (right), and a comparison of the  $\tau_2 = 0$  and  $\tau_1 = \tau_2$  traces (right). The W-Band simulation is the same 3-CCE simulation as in Figure 10. The Q-Band simulation has an identical input, except for the applied magnetic field;  $B_0 = 1.2$  T. While there are more ESEEM modulations in the Q-Band simulation, the decay envelopes are close to identical.
